# Supplementary material for: Dyes as efficient and reusable organocatalysts for the synthesis of cyclic carbonates from epoxides and CO2
Source: Royal Society of Chemistry journal article supplement (doi:10.1039/d3gc02161k), 2023-01-01
Supplement: d3gc02161k1.pdf [file d3gc02161k1.pdf]

## **Dyes as efficient and reusable organocatalysts for the synthesis of cyclic carbonates from epoxides and CO<sub>2</sub>**

Jing Chen,<sup>a</sup> Giulia Chiarioni,<sup>a</sup> Gert-Jan W. Euverink,<sup>b</sup> Paolo P. Pescarmona<sup>a,\*</sup>

<sup>a</sup> Chemical Engineering Group, Engineering and Technology Institute Groningen (ENTEG),  
University of Groningen, Nijenborgh 4, 9747 AG Groningen, The Netherlands.

<sup>b</sup> Biotechnology and Applied Microbiology Group, Engineering and Technology Institute  
Groningen (ENTEG), University of Groningen, Nijenborgh 4, 9747 AG Groningen, The  
Netherlands.

\*Corresponding author: E-mail: [p.p.pescarmona@rug.nl](mailto:p.p.pescarmona@rug.nl)

### **Supplementary information**

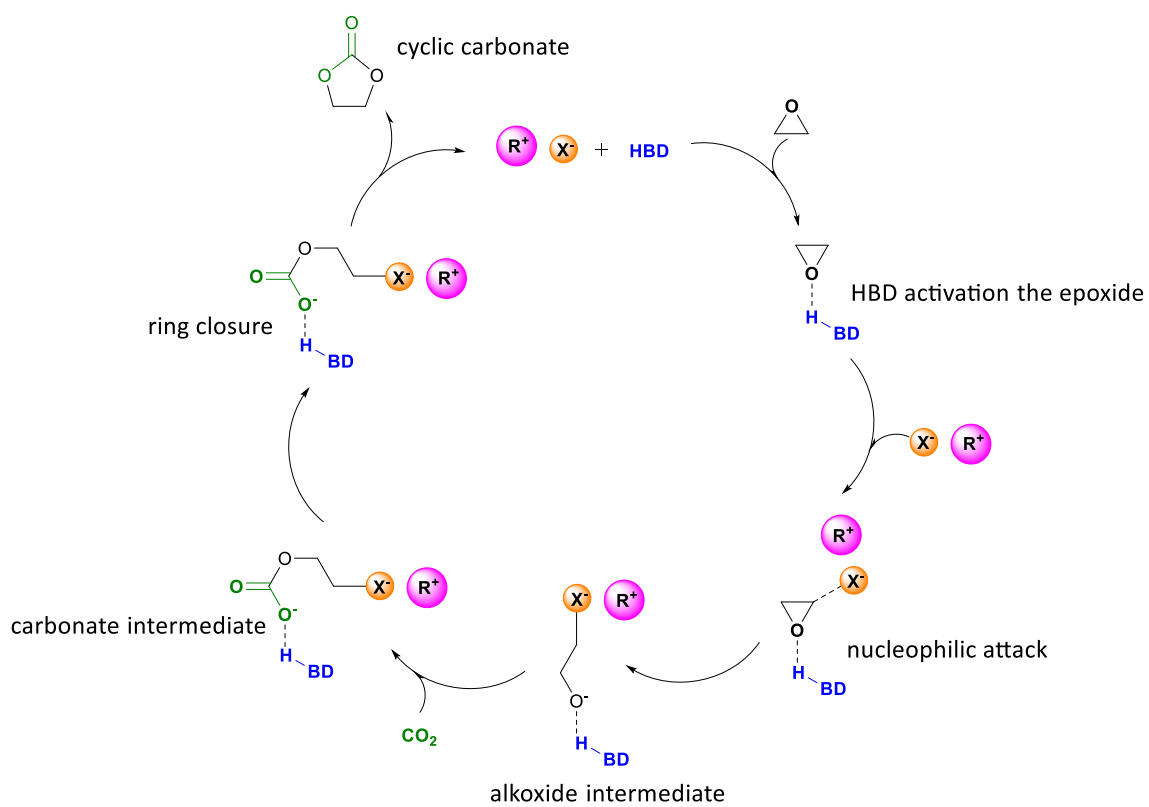

Scheme S1. Proposed mechanism for the conversion of  $\text{CO}_2$  and epoxides into cyclic carbonates catalysed by an organocatalyst, assisted by an HBD (based on refs. 8, 10, 12 in the main text).

Table S1. Visual evaluation of the solubility of the dye organocatalysts in the reaction mixture used for the conversion of styrene oxide into styrene carbonate at 80 °C.

| MB |       |    | MB-Br |       |    | MB-I |       |    | H <sub>2</sub> O [g] | PC [ml] |
|----|-------|----|-------|-------|----|------|-------|----|----------------------|---------|
| BF | 80 °C | AF | BF    | 80 °C | AF | BF   | 80 °C | AF |                      |         |
|    |       |    |       |       |    |      |       |    | 0                    | 0       |
|    |       |    |       |       |    |      |       |    | 0                    | 0.5     |
|    |       |    |       |       |    |      |       |    | 0                    | 1.0     |
|    |       |    |       |       |    |      |       |    | 0                    | 2.0     |
|    |       |    |       |       |    |      |       |    | 0.05                 | 1.0     |
|    |       |    |       |       |    |      |       |    | 0.05                 | 0       |

| RhB |       |    | RhB-Br |       |    | RhB-I |       |    | H <sub>2</sub> O [g] | PC [ml] |
|-----|-------|----|--------|-------|----|-------|-------|----|----------------------|---------|
| BF  | 80 °C | AF | BF     | 80 °C | AF | BF    | 80 °C | AF |                      |         |
|     |       |    |        |       |    |       |       |    | 0                    | 0       |
|     |       |    |        |       |    |       |       |    | 0.05                 | 0       |

| Rh6G |       |    | Rh6G-Br |       |    | Rh6G-I |       |    | H <sub>2</sub> O [g] | PC [ml] |
|------|-------|----|---------|-------|----|--------|-------|----|----------------------|---------|
| BF   | 80 °C | AF | BF      | 80 °C | AF | BF     | 80 °C | AF |                      |         |
|      |       |    |         |       |    |        |       |    | 0                    | 0       |
|      |       |    |         |       |    |        |       |    | 0                    | 0.5     |
|      |       |    |         |       |    |        |       |    | 0                    | 1.0     |
|      |       |    |         |       |    |        |       |    | 0                    | 2.0     |
|      |       |    |         |       |    |        |       |    | 0.05                 | 1.0     |
|      |       |    |         |       |    |        |       |    | 0.05                 | 0       |

| Solubility        | Largely insoluble | Partially soluble | Soluble |
|-------------------|-------------------|-------------------|---------|
| Colour indication |                   |                   |         |

The solubility of the organocatalysts in the reaction mixtures was determined visually before the catalytic test, either at room temperature after sonication for ca. 10 min (BF) or at the reaction temperature (80 °C) and after the catalytic test at room temperature (AF).

Table S2. Visual evaluation of the solubility of the dye organocatalysts in the reaction mixture used for the conversion of styrene oxide into styrene carbonate at low reaction temperature (45 °C).

| MB-I                                                                              |                                                                                   |                                                                                   |                      |         | Rh6G-I                                                                            |                                                                                    |                                                                                     |                      |         |
|-----------------------------------------------------------------------------------|-----------------------------------------------------------------------------------|-----------------------------------------------------------------------------------|----------------------|---------|-----------------------------------------------------------------------------------|------------------------------------------------------------------------------------|-------------------------------------------------------------------------------------|----------------------|---------|
| BF                                                                                | 45 °C                                                                             | AF                                                                                | H <sub>2</sub> O [g] | PC [ml] | BF                                                                                | 45 °C                                                                              | AF                                                                                  | H <sub>2</sub> O [g] | PC [ml] |
|  |  |  | 0.05                 | 0       |  |  |  | 0.05                 | 0       |
|  |  |  | 0.05                 | 3.9     |  |  |  | 0.05                 | 2.0     |

  

| RhB-I                                                                             |                                                                                   |                                                                                   |                      |         | RhB-EtOH-I                                                                        |                                                                                    |                                                                                     |                      |         |
|-----------------------------------------------------------------------------------|-----------------------------------------------------------------------------------|-----------------------------------------------------------------------------------|----------------------|---------|-----------------------------------------------------------------------------------|------------------------------------------------------------------------------------|-------------------------------------------------------------------------------------|----------------------|---------|
| BF                                                                                | 45 °C                                                                             | AF                                                                                | H <sub>2</sub> O [g] | PC [ml] | BF                                                                                | 45 °C                                                                              | AF                                                                                  | H <sub>2</sub> O [g] | PC [ml] |
|  |  |  | 0.05                 | 0       |  |  |  | 0                    | 0       |

  

| Solubility        | Largely insoluble                                                                 | Partially soluble                                                                  | Soluble                                                                             |
|-------------------|-----------------------------------------------------------------------------------|------------------------------------------------------------------------------------|-------------------------------------------------------------------------------------|
| Colour indication |  |  |  |

The solubility of the organocatalysts in the reaction mixtures was determined visually before the catalytic test, either at room temperature after sonication for ca. 10 min (BF) or at the reaction temperature (45 °C) and after the catalytic test at room temperature (AF).

Table S3. Visual evaluation of the solubility of the dye organocatalysts in the reaction mixture used for the investigation of the conversion of different epoxides into the corresponding cyclic carbonates.

| Propylene oxide <sup>[a]</sup> |    |       |    |                      |         | Epichlorohydrin |       |    |                      |         |
|--------------------------------|----|-------|----|----------------------|---------|-----------------|-------|----|----------------------|---------|
|                                | BF | 35 °C | AF | H <sub>2</sub> O [g] | PC [ml] | BF              | 60 °C | AF | H <sub>2</sub> O [g] | PC [ml] |
| RhB-I                          |    |       |    | 0.05                 | 0       |                 |       |    | 0.05                 | 0       |
| Rh6G-I                         |    |       |    | 0.05                 | 0       |                 |       |    | 0.05                 | 1.0     |
| RhB-EtOH-I                     |    |       |    | 0.05                 | 0       |                 |       |    | 0.05                 | 0       |

  

| Allyl glycidyl ether |    |       |    |                      | Styrene oxide |    |       |    |                      |         |
|----------------------|----|-------|----|----------------------|---------------|----|-------|----|----------------------|---------|
|                      | BF | 60 °C | AF | H <sub>2</sub> O [g] | PC [ml]       | BF | 60 °C | AF | H <sub>2</sub> O [g] | PC [ml] |
| RhB-I                |    |       |    | 0.05                 | 0             |    |       |    | 0.05                 | 0       |
| Rh6G-I               |    |       |    | 0.05                 | 0.5           |    |       |    | 0.05                 | 0.5     |
| RhB-EtOH-I           |    |       |    | 0.05                 | 0             |    |       |    | 0.05                 | 0.5     |

  

| 1,2-epoxyhexane           |    |       |    |                      | Cyclohexene oxide |    |        |    |                      |         |
|---------------------------|----|-------|----|----------------------|-------------------|----|--------|----|----------------------|---------|
|                           | BF | 80 °C | AF | H <sub>2</sub> O [g] | PC [ml]           | BF | 120 °C | AF | H <sub>2</sub> O [g] | PC [ml] |
| RhB-I                     |    |       |    | 0.05                 | 1.0               |    |        |    | 0.05                 | 0.5     |
| Rh6G-I                    |    |       |    | 0.05                 | 0.7               |    |        |    | 0.05                 | 0.5     |
| RhB-EtOH-I <sup>[b]</sup> |    |       |    | 0.05                 | 0.5               |    |        |    | 0.05                 | 0.5     |

  

| Limonene oxide <sup>[a]</sup> |    |        |    |                      |         |
|-------------------------------|----|--------|----|----------------------|---------|
|                               | BF | 110 °C | AF | H <sub>2</sub> O [g] | PC [ml] |
| RhB-I                         |    |        |    | 0.05                 | 0.5     |
| Rh6G-I                        |    |        |    | 0.05                 | 0.5     |
| RhB-EtOH-I                    |    |        |    | 0.05                 | 0.5     |

  

| Solubility        | Largely insoluble | Partially soluble | Soluble |
|-------------------|-------------------|-------------------|---------|
| Colour indication |                   |                   |         |

The solubility of the organocatalysts in the reaction mixtures was determined visually before the catalytic test, either at room temperature after sonication for ca. 10 min (BF) or at the reaction temperature (80 °C) and after the catalytic test at room temperature (AF). <sup>[a]</sup> In the case of propylene oxide and limonene oxide the solubility of the dyes was not tested at the reaction temperature (60 °C for propylene oxide, 120 °C for limonene oxide) but at the boiling point of this epoxide (34 °C for propylene oxide and 110 °C for limonene oxide). <sup>[b]</sup> The solubility of RhB-EtOH-I in 1,2-epoxyhexane was determined at 60 °C as this was the reaction temperature at which this organocatalyst was tested.

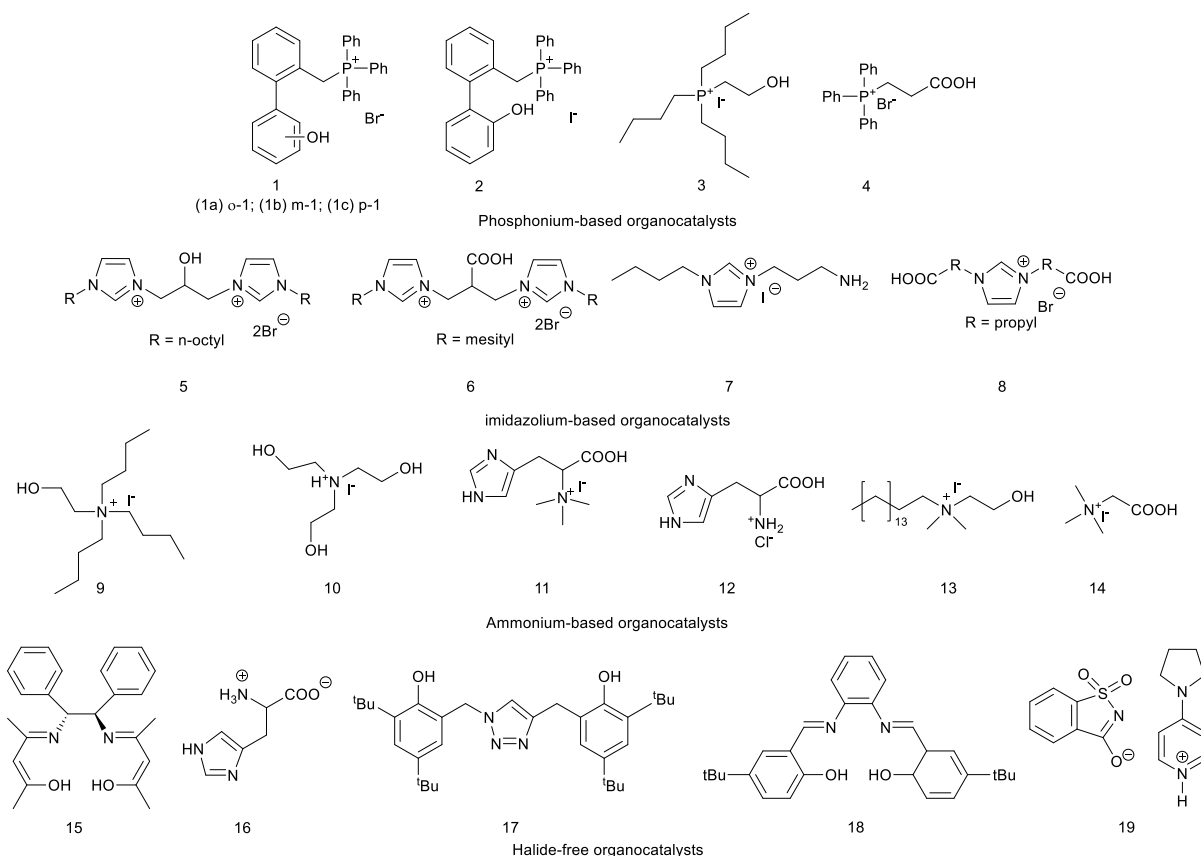

Table S4. Catalytic activity of selected organocatalysts in the CO<sub>2</sub> cycloaddition to styrene oxide

| Entry             | Catalyst   | Catalyst loading [mol %] | T [°C] | P [MPa] | T [h] | Yield [%] | Selectivity [%] | TON <sup>[f]</sup> | TOF <sup>[g]</sup> [h <sup>-1</sup> ] | Ref. <sup>[h]</sup> |
|-------------------|------------|--------------------------|--------|---------|-------|-----------|-----------------|--------------------|---------------------------------------|---------------------|
| 1 <sup>[a]</sup>  | RhB-EtOH-I | 1                        | 45     | 1       | 18    | 32        | > 93            | 32                 | 2                                     | This work           |
| 2 <sup>[b]</sup>  | RhB-EtOH-I | 1                        | 60     | 1       | 24    | 54        | ≥ 99            | 54                 | 2                                     | work                |
| 3                 | 1a         | 1                        | 60     | 0.1     | 24    | 80        | -               | 80                 | 3                                     | 35                  |
| 4                 | 1b         | 1                        | 60     | 0.1     | 24    | 41        | -               | 41                 | 2                                     | 35                  |
| 5                 | 1c         | 1                        | 60     | 0.1     | 24    | 65        | -               | 65                 | 3                                     | 35                  |
| 6                 | 2          | 1                        | 60     | 0.1     | 24    | 91        | -               | 91                 | 4                                     | 35                  |
| 7                 | 3          | 5                        | 45     | 1       | 18    | 76        | -               | 15                 | 1                                     | 58                  |
| 8                 | 4          | 0.5                      | 130    | 2.5     | 3     | ≥ 99      | ≥ 99            | 198                | 66                                    | 65                  |
| 9                 | 5          | 5                        | 70     | 0.4     | 16    | 90        | ≥ 99            | 18                 | 1                                     | 66                  |
| 10                | 6          | 5                        | 70     | 0.4     | 16    | 93        | ≥ 99            | 19                 | 1                                     | 67                  |
| 11                | 7          | 1                        | 120    | 1.5     | 2     | 85        | > 99            | 85                 | 43                                    | 68                  |
| 12                | 8          | 1                        | 125    | 2       | 1     | 95        | > 99            | 95                 | 95                                    | 64                  |
| 13                | 9          | 5                        | 45     | 1       | 18    | 89        | -               | 18                 | 1                                     | 34                  |
| 14                | 10         | 2                        | 110    | 2       | 6     | 84        | 99              | 42                 | 7                                     | 33                  |
| 15                | 11         | 0.3                      | 120    | 0.1     | 6     | 95        | 99              | 317                | 53                                    | 69                  |
| 16                | 12         | 1                        | 130    | 8       | 48    | 92        | -               | 92                 | 2                                     | 70                  |
| 17 <sup>[c]</sup> | 13         | 2                        | 120    | 1.5     | 23    | 87        | 88              | 44                 | 2                                     | 71                  |
| 18                | 14         | 2                        | 120    | 1.2     | 2     | 79        | 99              | 40                 | 20                                    | 72                  |
| 19                | 14         | 2.5                      | 140    | 8       | 8     | 96        | -               | 38                 | 5                                     | 73                  |
| 20                | 15         | 0.2                      | 110    | 1       | 12    | 56        | > 99            | 280                | 23                                    | 74                  |
| 21 <sup>[d]</sup> | 16         | 0.4                      | 120    | 1.2     | 3     | 64        | 82              | 160                | 53                                    | 75                  |
| 22                | 17         | 1                        | 120    | 1       | 24    | 95        | -               | 95                 | 4                                     | 76                  |
| 23 <sup>[e]</sup> | 18         | 5                        | 120    | 1       | 24    | 84        | 93              | 17                 | 0.7                                   | 77                  |
| 24                | 19         | 10                       | 120    | 0.1     | 24    | 81        | 89              | 8                  | 0.3                                   | 78                  |

[a] 50 mg H<sub>2</sub>O as an HBD. [b] 50 mg H<sub>2</sub>O as an HBD, 0.5 ml propylene carbonate as a solvent. [c] 40 ml benzonitrile as a solvent. [d] 0.1 g H<sub>2</sub>O added as a co-catalyst. [e] 2-MeTHF as a solvent. [f] Turnover number, TON = mol<sub>product</sub>/mol<sub>catalyst</sub>. [g] Turnover frequency, TOF = TON/h. [h] The reference numbers are those used in the main text of the article.

## Reusability test of RhB-EtOH-I catalyst for the synthesis of propylene carbonate

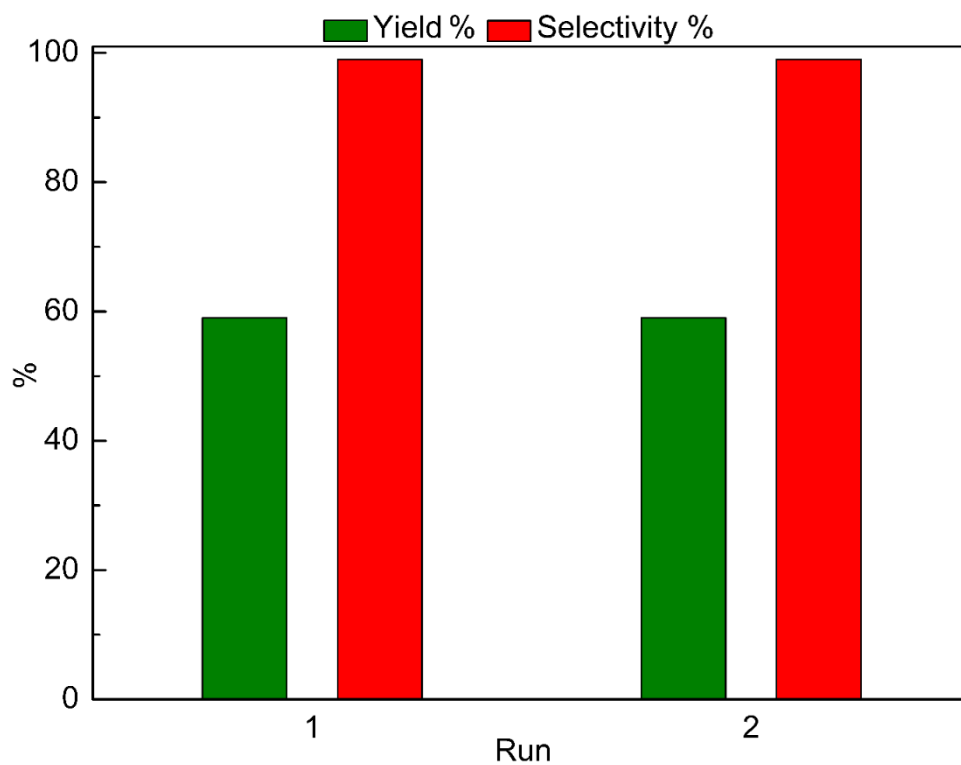

Figure S1. Reusability test of RhB-EtOH-I as catalyst for the synthesis of propylene carbonate from CO<sub>2</sub> and propylene oxide. Reaction conditions: 10 bar CO<sub>2</sub>, 60 °C, 24 h.

The cumulative TON reached in these two catalytic tests is 119 (cumulative TON = TON<sub>run 1</sub> + TON<sub>run 2</sub> = mol<sub>product, run 1</sub>/mol<sub>catalyst, run 1</sub> + mol<sub>product, run 2</sub>/mol<sub>catalyst, run 2</sub>).

## Nanofiltration samples

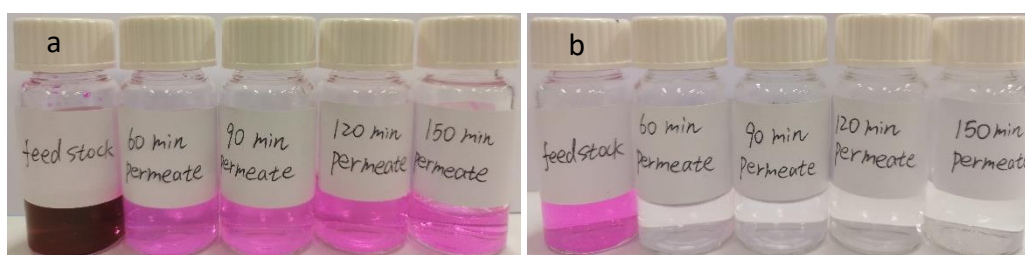

Figure S2. Samples obtained in the nanofiltration tests: feedstock (after having been recirculated for 15 min) and permeate. (a) First nanofiltration test, with the following feed composition: RhB: 0.51 g, propylene carbonate: 10.01 g, H<sub>2</sub>O: 1 L; pressure: 1 barg, feed flow rate: 50 L h<sup>-1</sup>. (b) Second nanofiltration test, with a feed composition mimicking that of the permeate of the first nanofiltration test: RhB: 0.005g, propylene carbonate: 0.14 g, H<sub>2</sub>O: 1 L; pressure: 1 barg, feed flow rate: 50 L h<sup>-1</sup>.

## Photocatalytic tests with RhB-EtOH-I

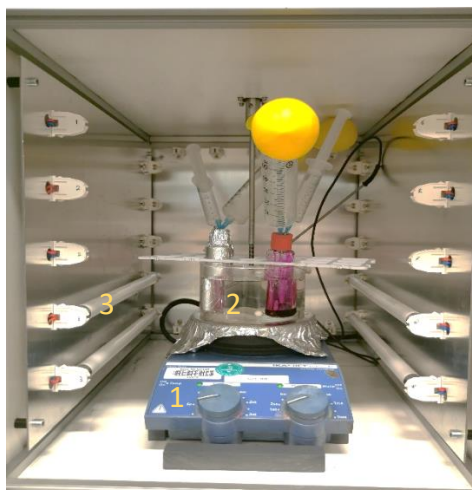

Figure S3. Photoreactor used to test the catalytic activity of RhB-EtOH-I under visible light: (1) stirring plate; (2) oil bath; (3) visible LED light (400-700 nm).



### UV-Vis absorption spectra of RhB and RhB-EtOH-I

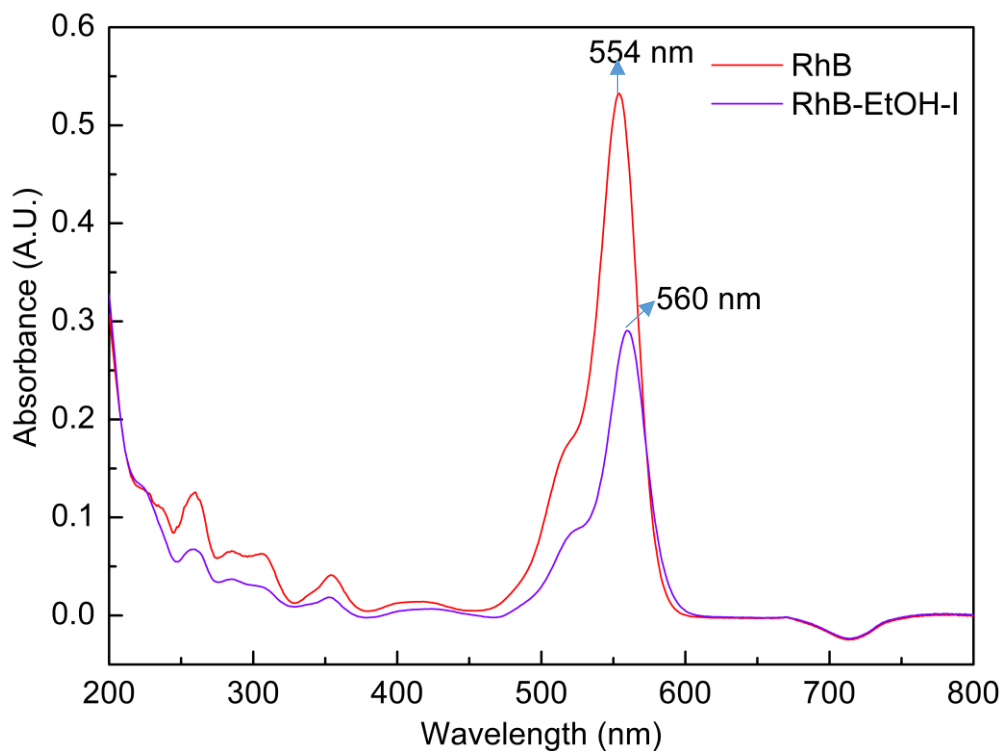

Figure S4. UV-Vis absorption spectra of RhB and RhB-EtOH-I.

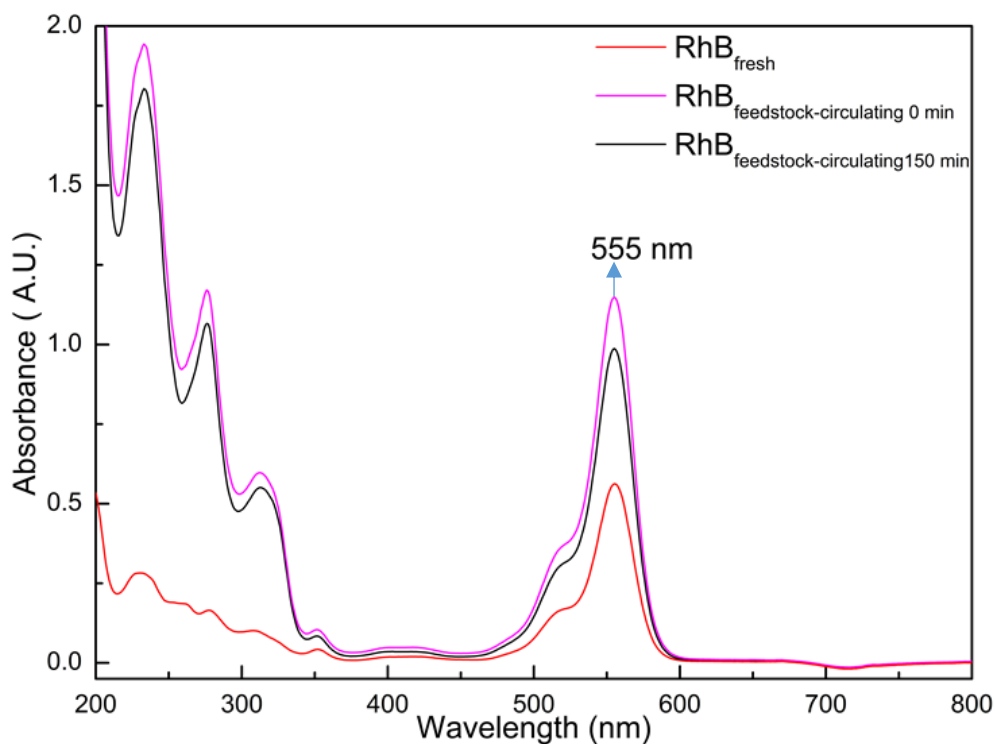

Figure S5. UV-Vis absorption spectra of RhB samples (in acetonitrile): freshly prepared solution and samples collected from the concentrated feedstock of the nanofiltration experiments [0.5 ml of a nanofiltration sample (data in Table 4) were taken and concentrated by freeze-drying. The dried sample was dissolved in 10 ml acetonitrile and measured by UV-Vis spectroscopy].

## $^1\text{H}$ NMR spectra of the reaction mixtures

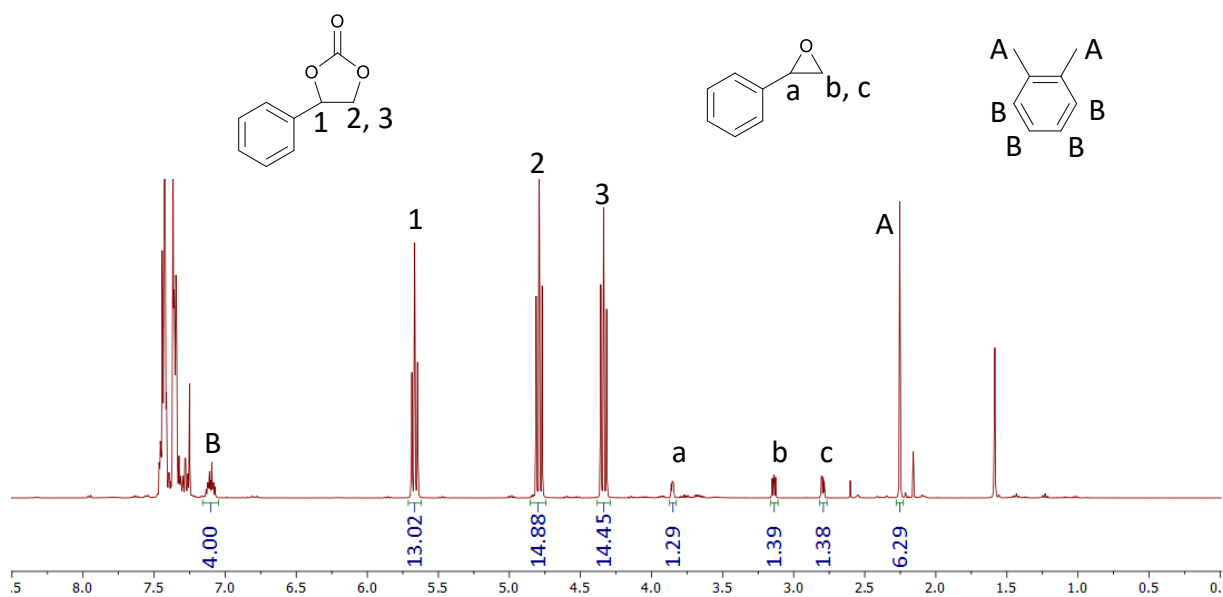

Figure S6.  $^1\text{H}$  NMR spectrum of the reaction mixture for the cycloaddition of  $\text{CO}_2$  to styrene oxide.

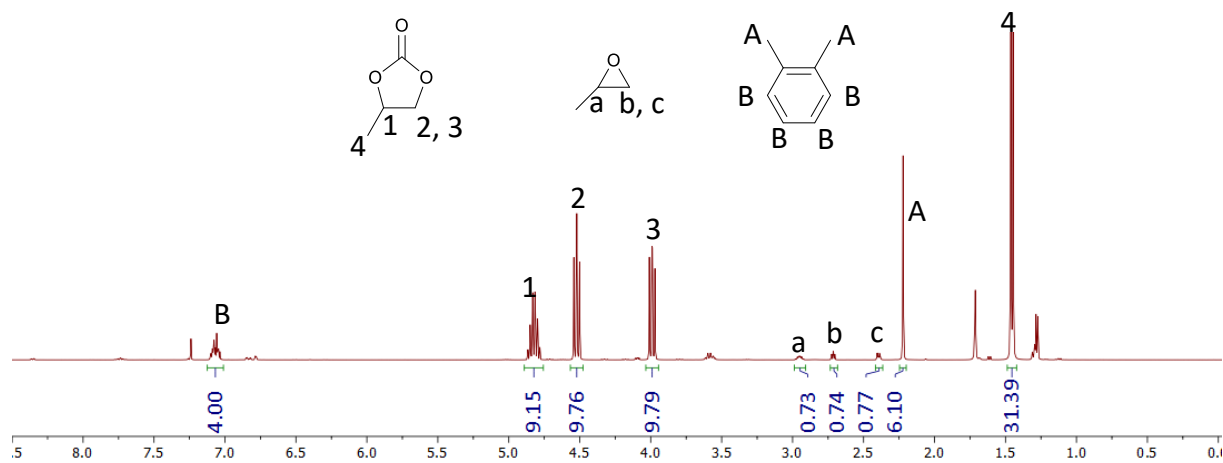

Figure S7.  $^1\text{H}$  NMR spectrum of the reaction mixture for the cycloaddition of  $\text{CO}_2$  to propylene oxide.

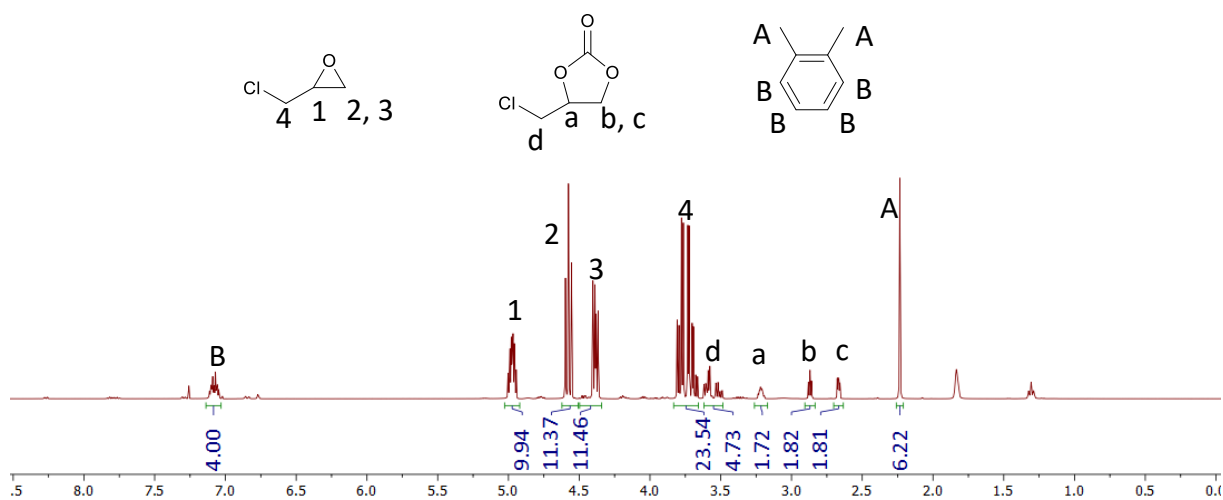

Figure S8.  $^1\text{H}$  NMR spectrum of the reaction mixture for the cycloaddition of  $\text{CO}_2$  to epichlorohydrin.

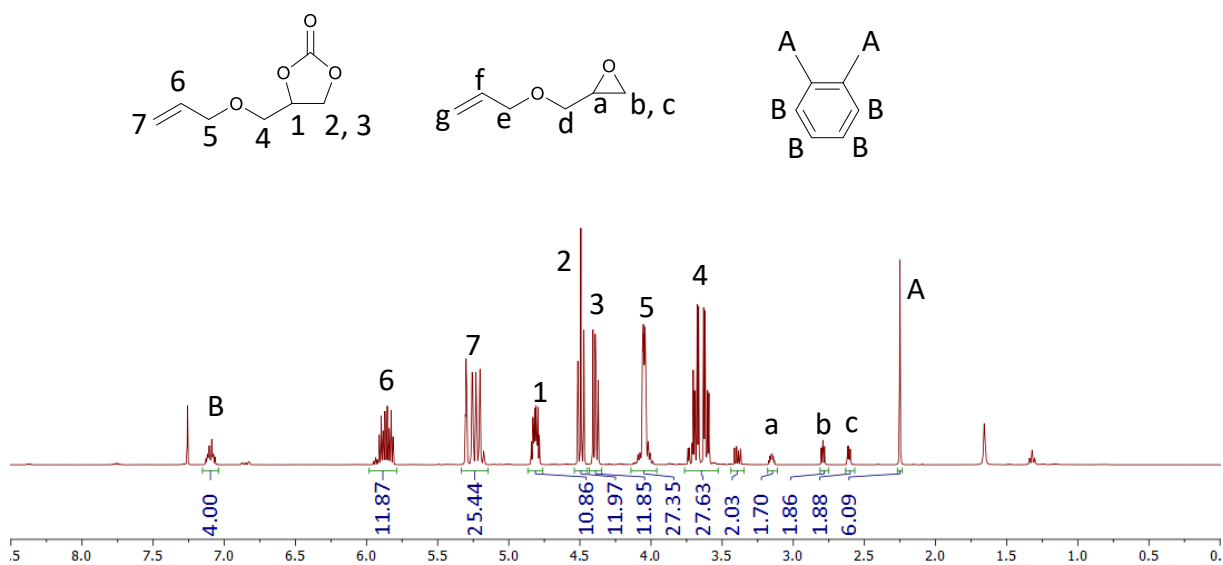

Figure S9.  $^1\text{H}$  NMR spectrum of the reaction mixture for the cycloaddition of  $\text{CO}_2$  to allyl glycidyl ether.

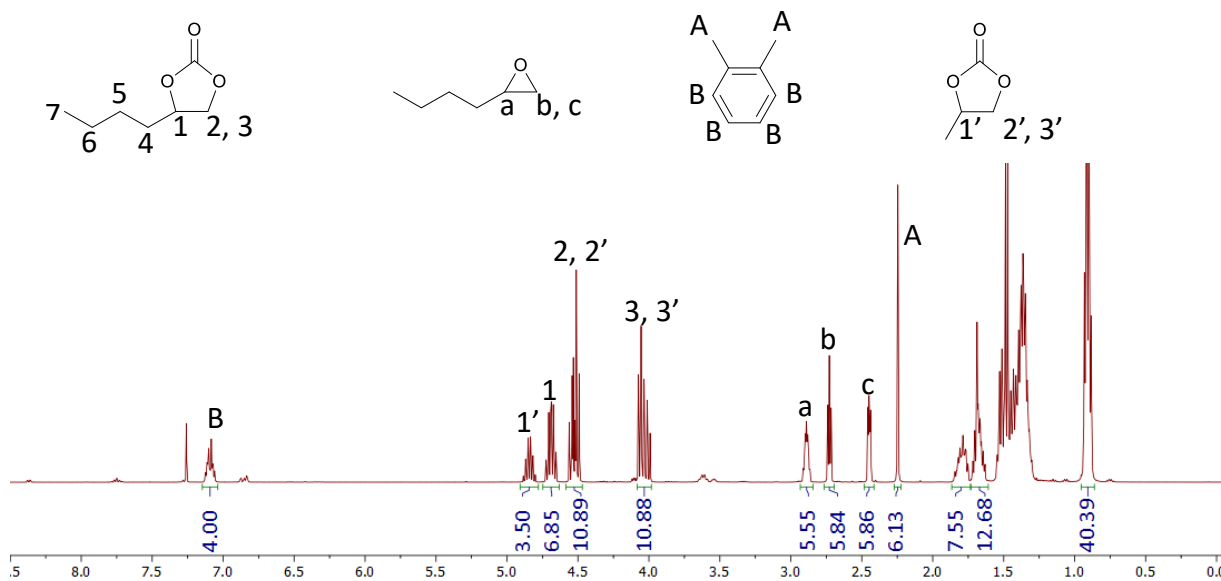

Figure S10.  $^1\text{H}$  NMR spectrum of the reaction mixture for the cycloaddition of  $\text{CO}_2$  to 1,2-epoxyhexane (PC as the solvent).

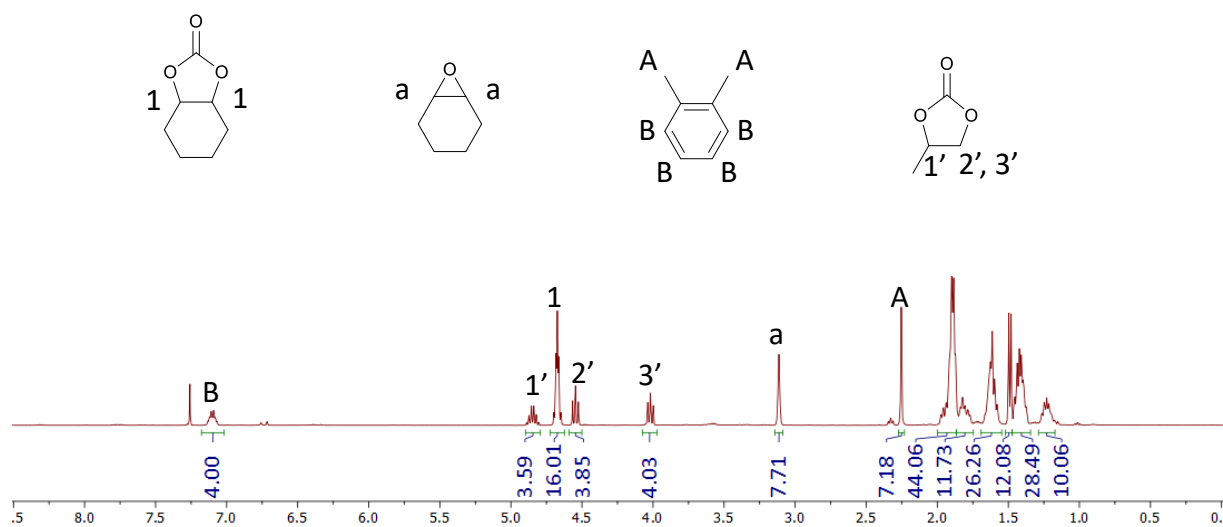

Figure S11.  $^1\text{H}$  NMR spectrum of the reaction mixture for the cycloaddition of  $\text{CO}_2$  to cyclohexene oxide (PC as the solvent).

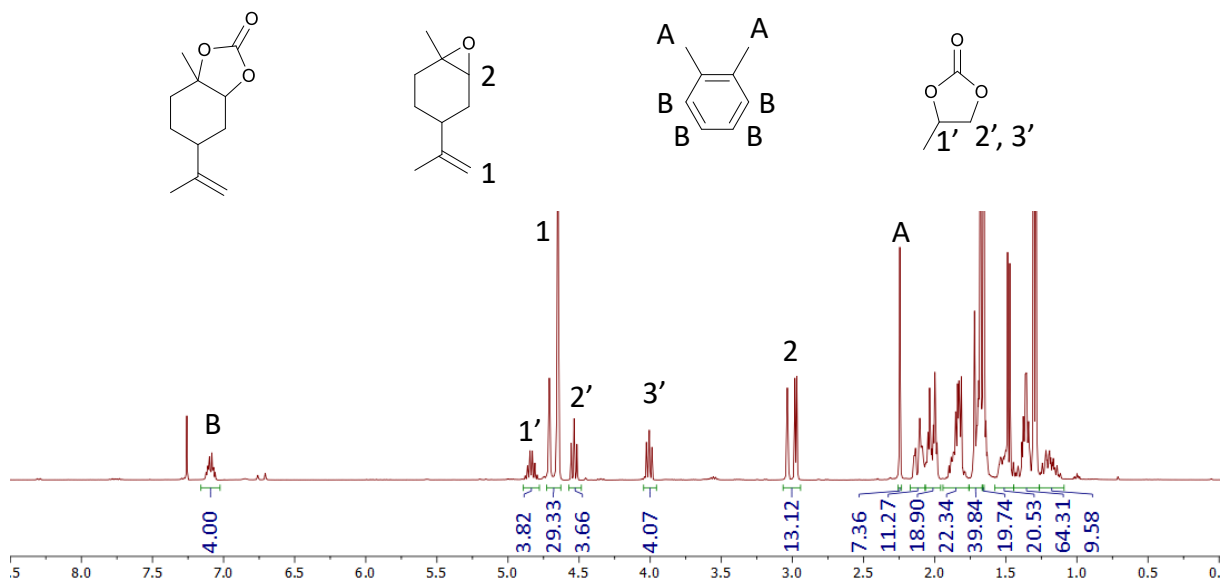

Figure S12. <sup>1</sup>H NMR spectrum of the reaction mixture for the cycloaddition of CO<sub>2</sub> to limonene oxide (PC as the solvent).

## NMR spectra of RhB-EtOH-Br

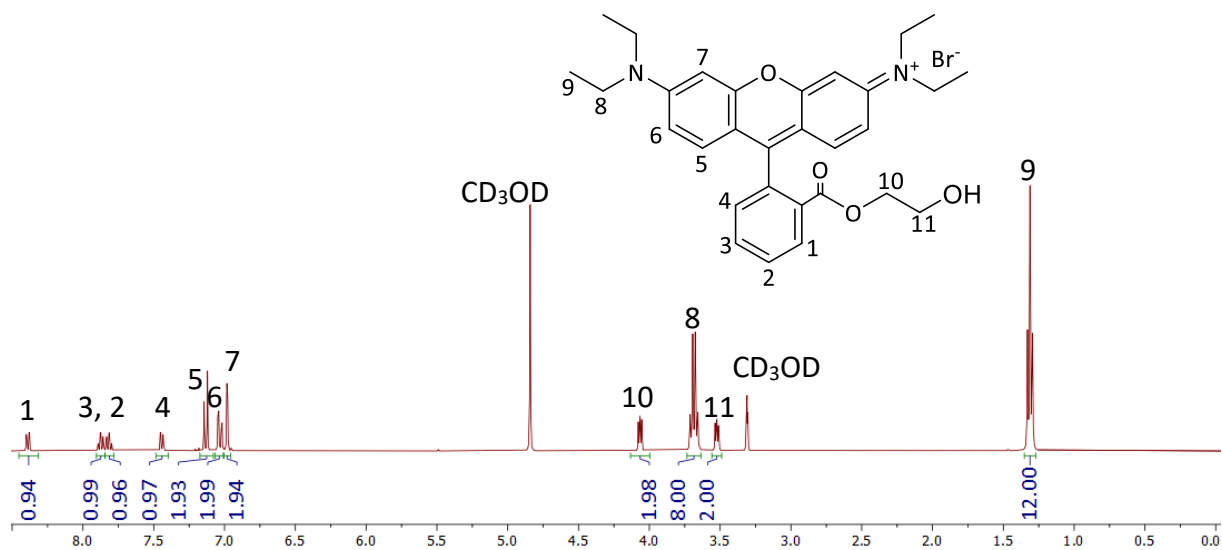

Figure S13.  $^1\text{H}$  NMR spectrum of RhB-EtOH-Br.

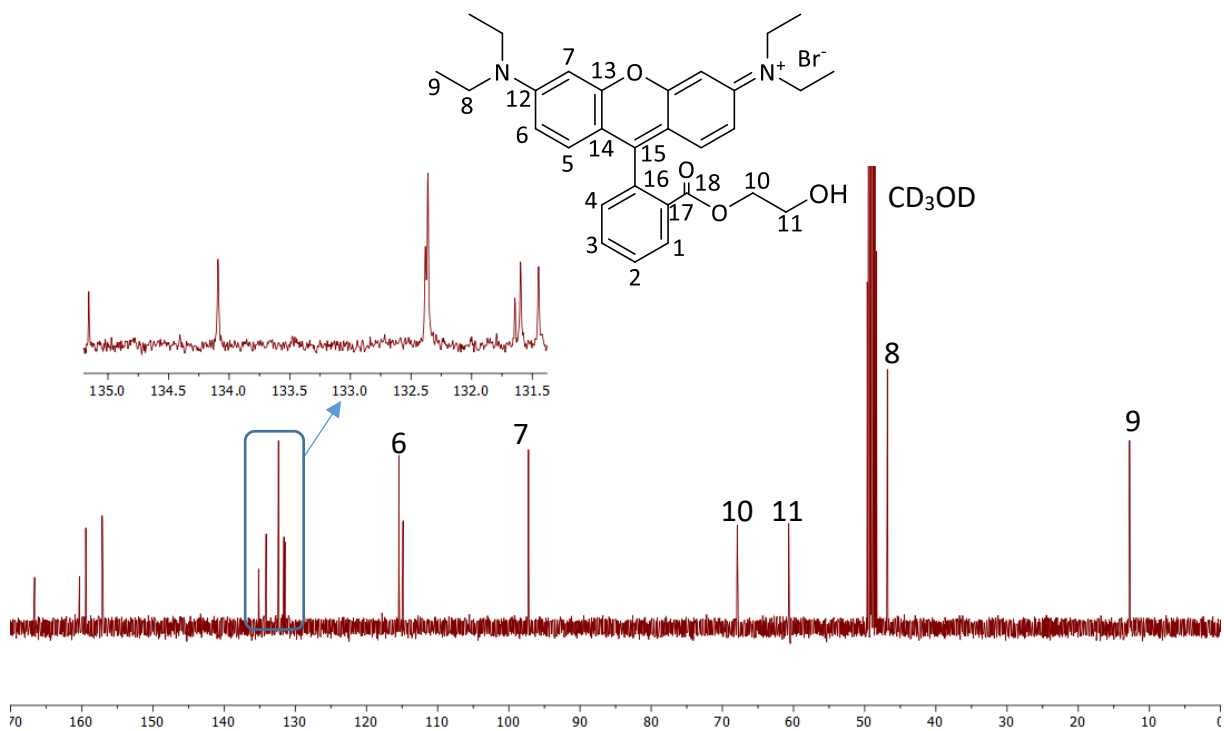

Figure S14.  $^{13}\text{C}$  NMR spectrum of RhB-EtOH-Br.

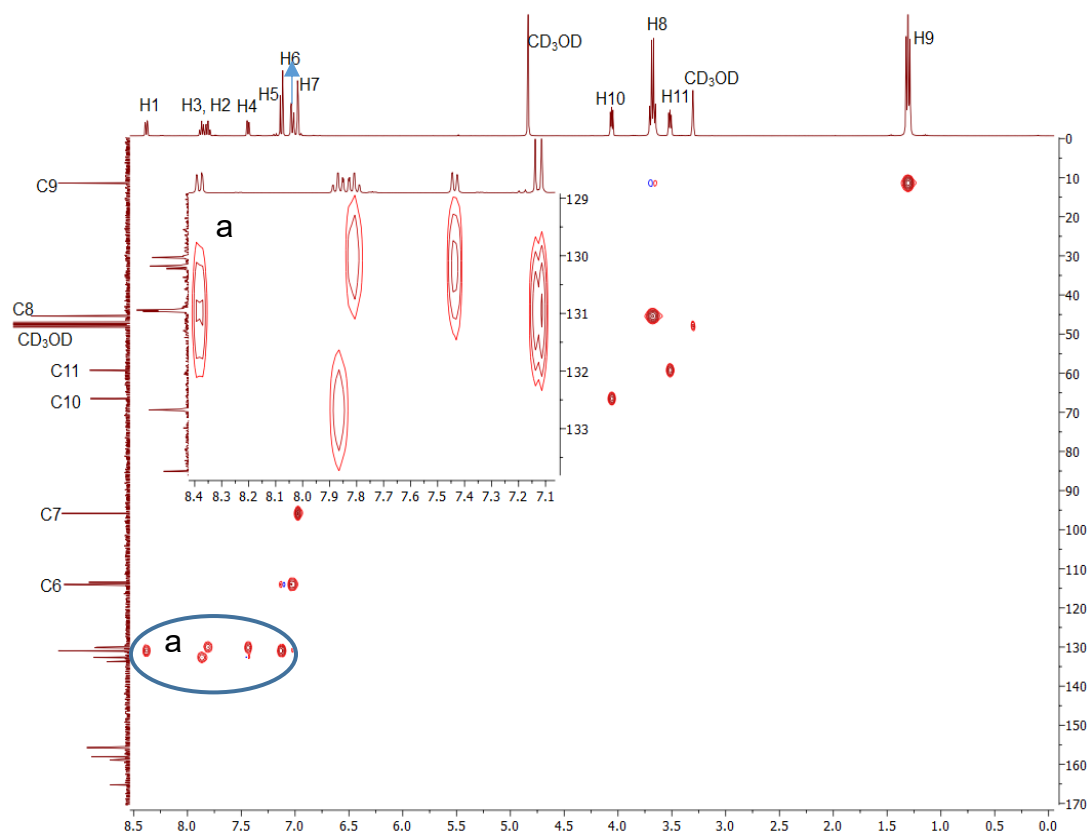

Figure S15.  $^1\text{H}$ - $^{13}\text{C}$  HSQC NMR spectrum of RhB-EtOH-Br.

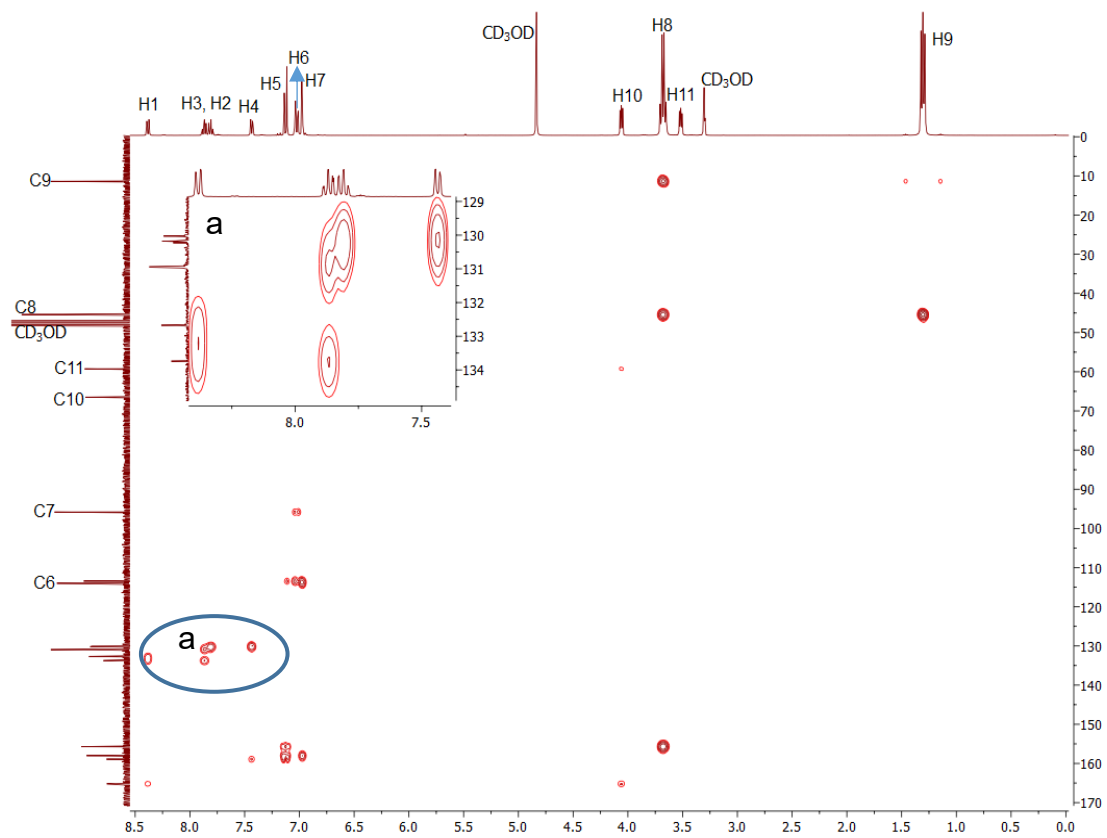

Figure S16.  $^1\text{H}$ - $^{13}\text{C}$  HMBC NMR spectrum of RhB-EtOH-Br.

### NMR spectra of RhB-EtOH-I

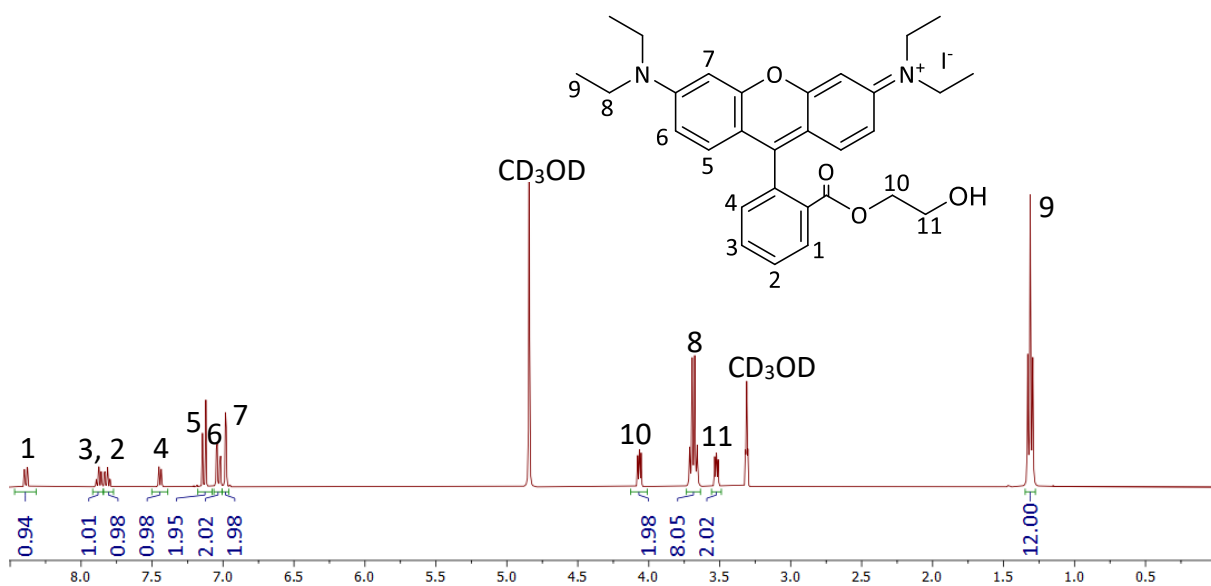

Figure S17. <sup>1</sup>H NMR spectrum of RhB-EtOH-I.

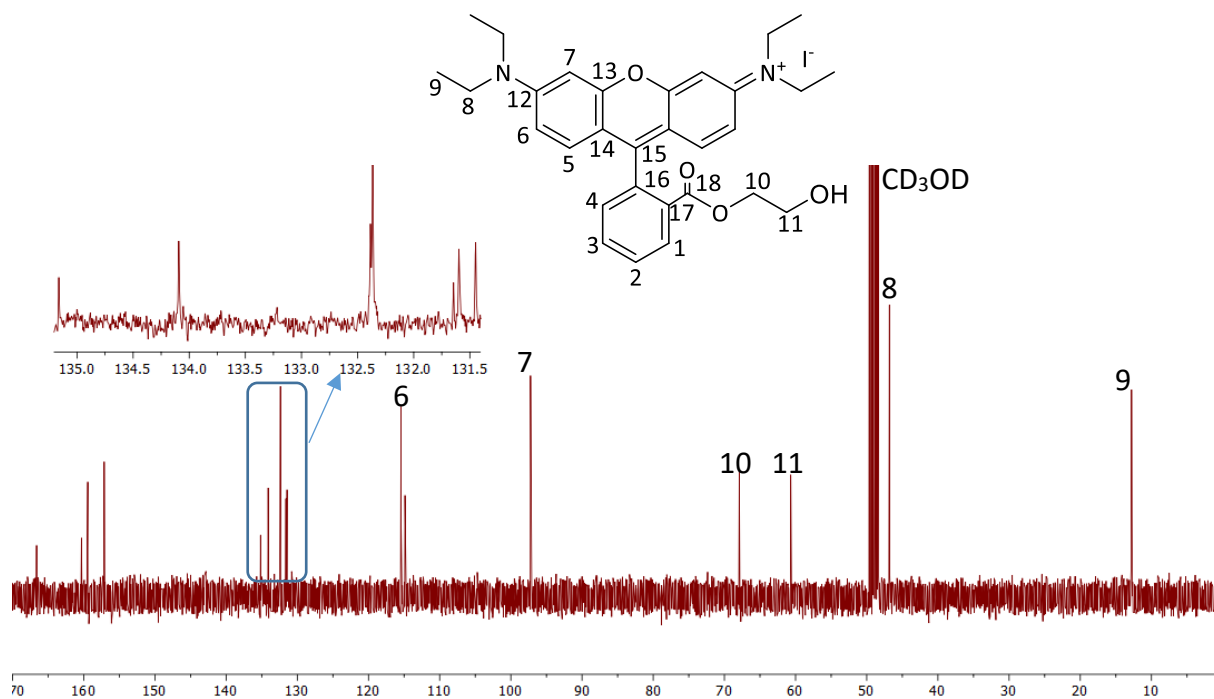

Figure S18. <sup>13</sup>C NMR spectrum of RhB-EtOH-I.



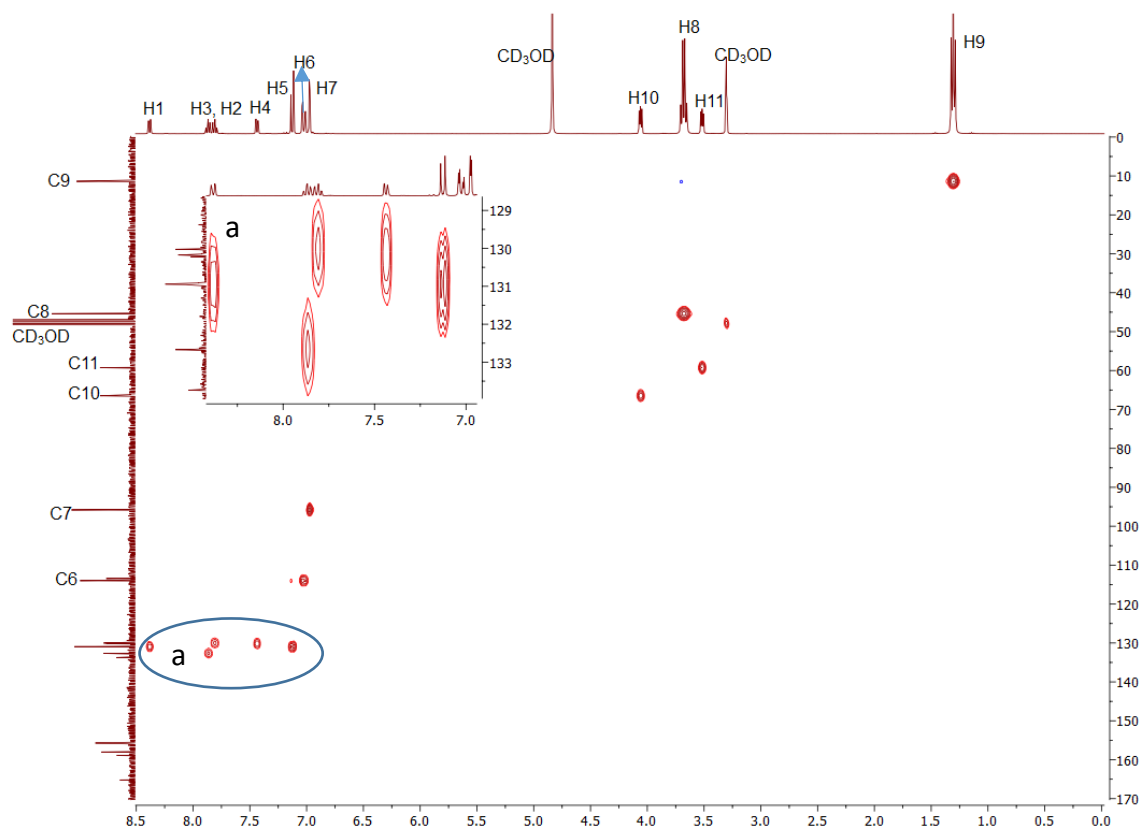

Figure S19.  $^1\text{H}$ - $^{13}\text{C}$  HSQC NMR spectrum of RhB-EtOH-I.

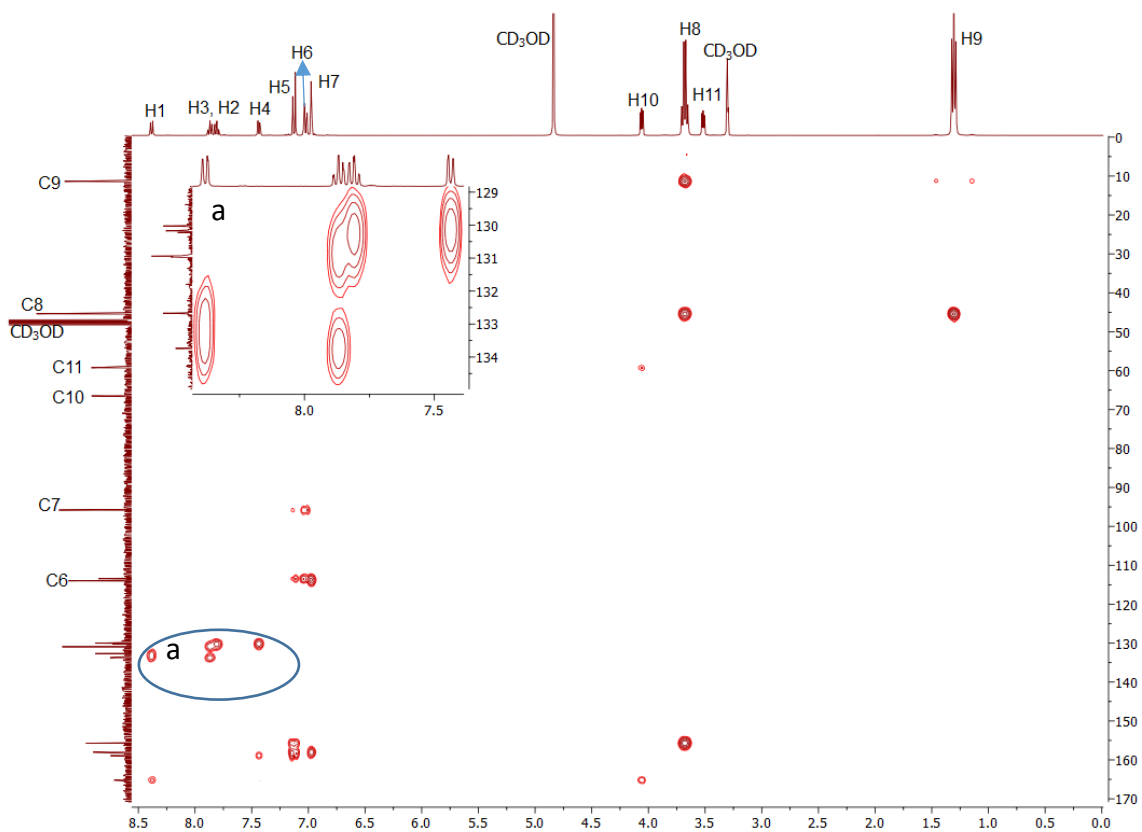

Figure S20.  $^1\text{H}$ - $^{13}\text{C}$  HMBC NMR spectrum of RhB-EtOH-I.

## NMR spectra of purified styrene carbonate

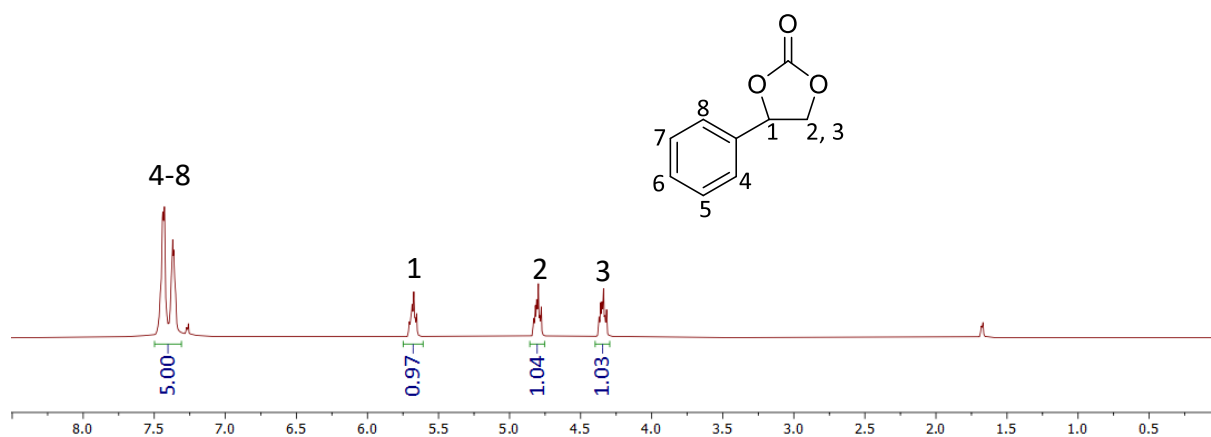

Figure S21.  $^1\text{H}$  NMR spectrum of purified styrene carbonate.

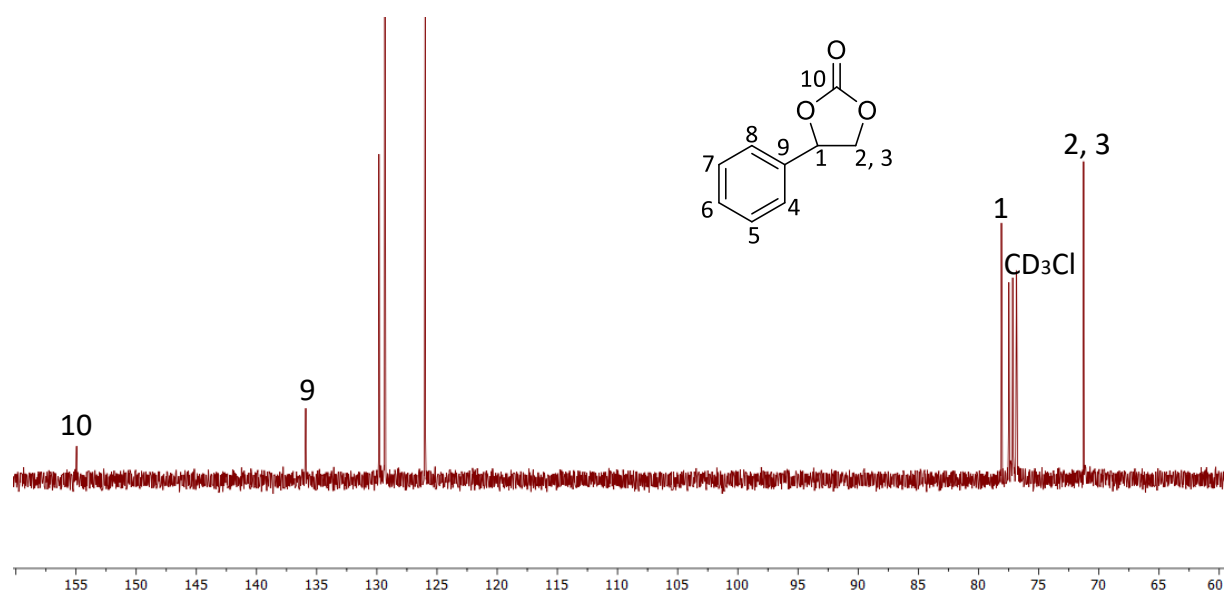

Figure S22.  $^{13}\text{C}$  NMR spectrum of purified styrene carbonate.

### NMR spectra of the fresh and recovered RhB-EtOH-I (in CDCl<sub>3</sub>)

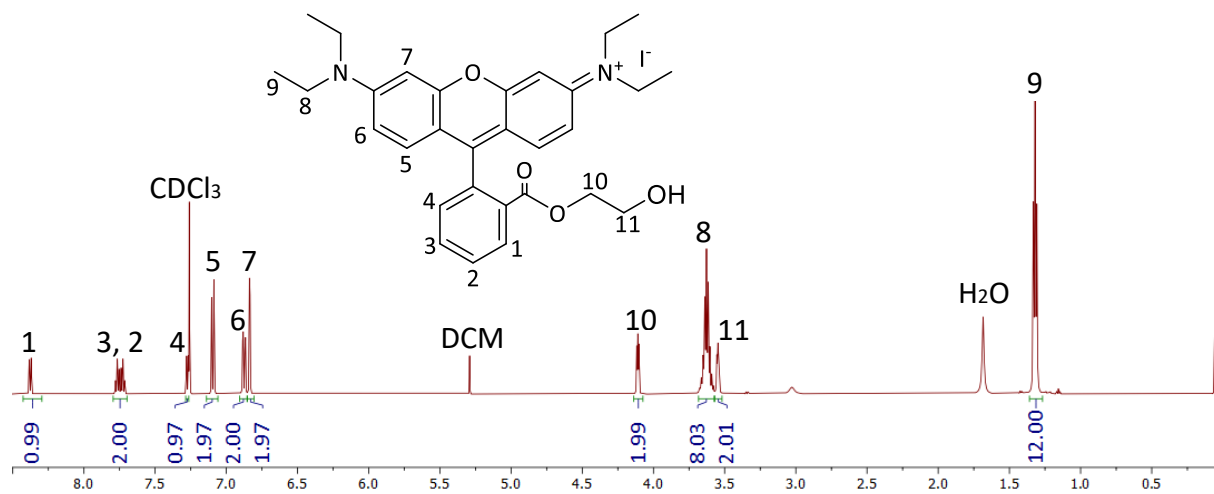

Figure S23. <sup>1</sup>H NMR spectrum (in CDCl<sub>3</sub>) of the fresh RhB-EtOH-I organocatalyst.

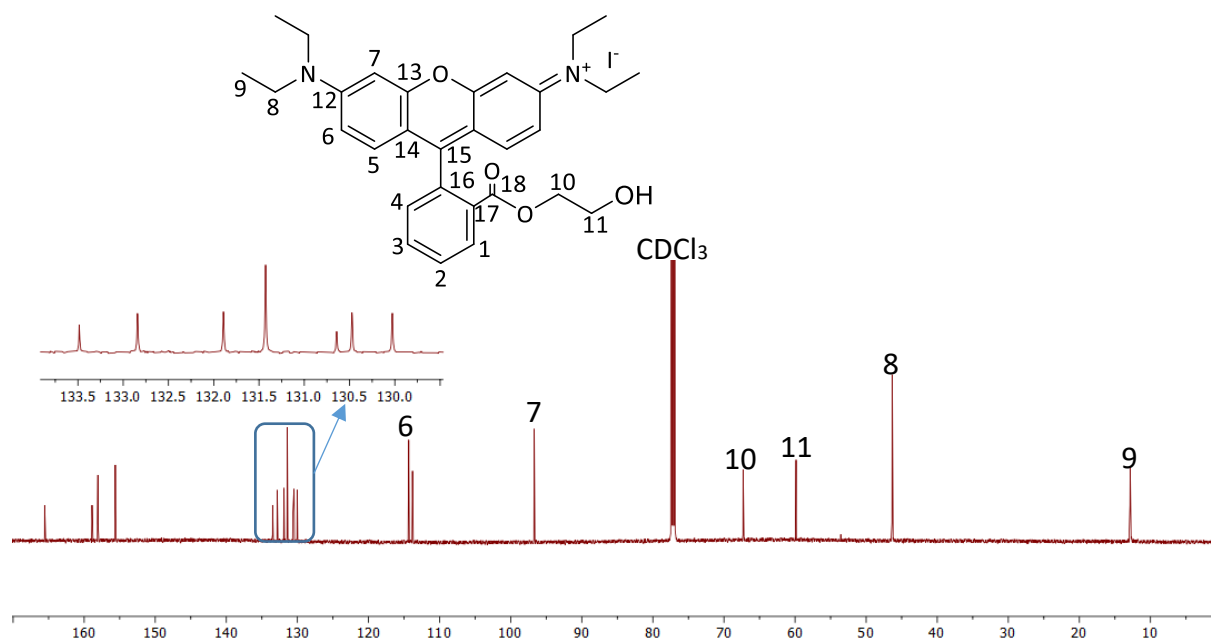

Figure S24. <sup>13</sup>C NMR spectrum (in CDCl<sub>3</sub>) of the fresh RhB-EtOH-I organocatalyst.

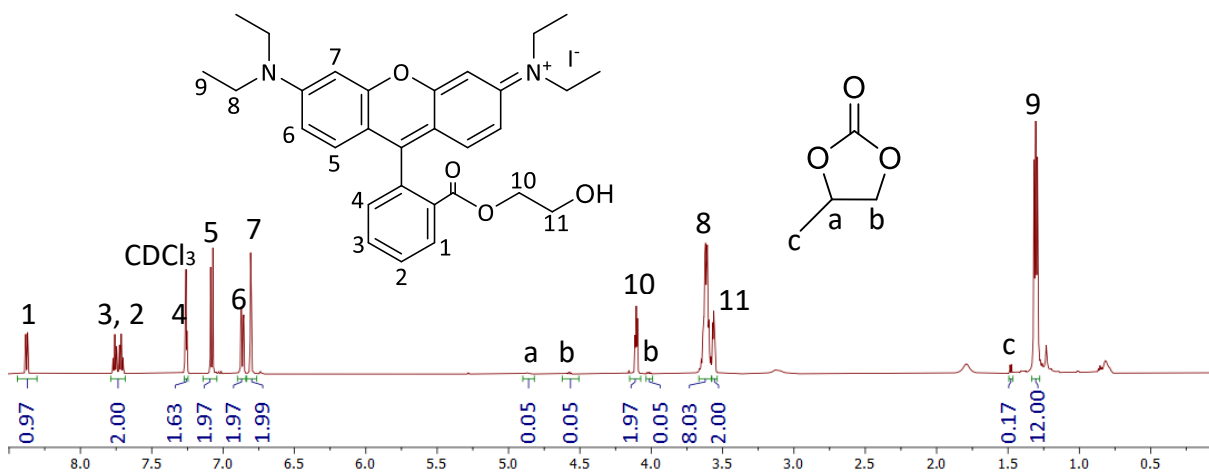

Figure S25.  $^1\text{H}$  NMR spectrum (in  $\text{CDCl}_3$ ) of the recovered RhB-EtOH-I organocatalyst.

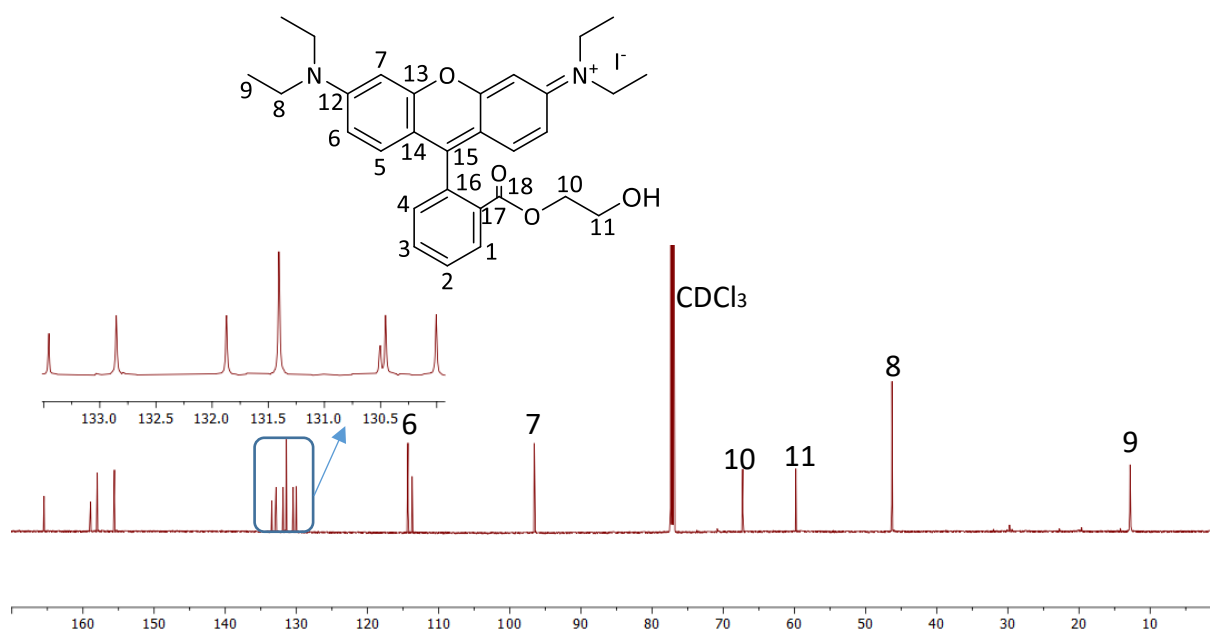

Figure S26.  $^{13}\text{C}$  NMR spectrum (in  $\text{CDCl}_3$ ) of the recovered RhB-EtOH-I organocatalyst.
